# Supplementary material
Source: Springer Nature journal article supplement (https://www.springermedizin.de/resource/supplementary/13023_2011_322_MOESM1_ESM.pdf/9642106)

**Odds Ratios  
(95% Confidence Interval)**

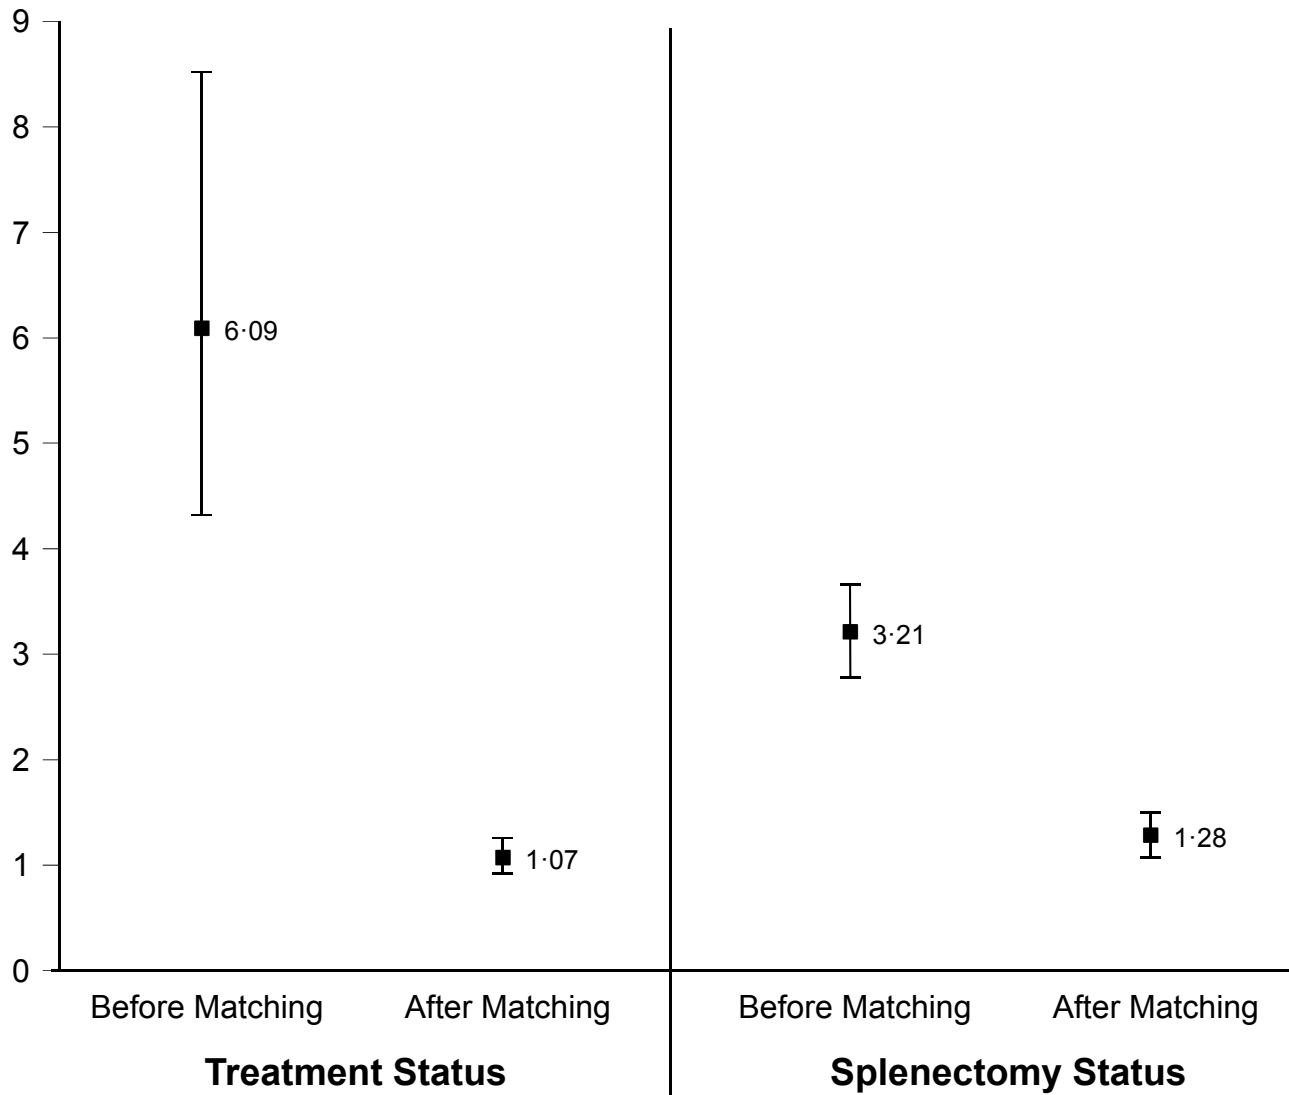

Supplement: MOESM1 [file 9642106]
